# A quantitative review of relationships between ecosystem services

Heera Lee<sup>a,\*</sup>, Sven Lautenbach<sup>a</sup>

*<sup>a</sup>Faculty of Agriculture, Land use modeling and Ecosystem Services, University of Bonn, Nußallee 1, 53115 Bonn, Germany*

---

## Abstract

Ecosystems provide multiple ecosystem services to society. Ignoring the multi-functionality of land systems in natural resource management generates potentially trade-offs with respect to the provisioning of ecosystem services. Understanding relationships between ecosystem services can therefore help to minimize undesired trade-offs and enhance synergies. The research on relationships between ecosystem services has recently gained increasing attention in the scientific community. However, a synthesis on existing knowledge and knowledge gaps is missing so far. We analyzed 67 case studies that studied 476 pairwise combinations of ecosystem services. The relationships between these pairs of ecosystem services were classified into three categories: “trade-off”, “synergy” or “no-effect”. Most pairs of ecosystem services (74%) had a clear association with one category: the majority of case studies reported similar relationships for pairs of ecosystem services. A synergistic relationship was dominant between different regulating services and between different

---

\*Corresponding author: Tel.: +49 228 732925; Fax: +49 228 733708  
*Email address: [hlee@uni-bonn.de](mailto:hlee@uni-bonn.de) (Heera Lee)*

cultural services, whereas the relationship between regulating and provisioning services was trade-off dominated. Increases in cultural services did not influence provisioning services ("no-effect"). We further analyzed the pattern of relationships between ecosystem services across scales, land system archetypes and methods used to determine the relationship. Our analysis showed that the overall pattern of relationships between ecosystem services did not change significantly with scale and land system archetypes. However, some pairs of ecosystem services showed changes in relationships with scale. The choice of methods used to determine the relationship had an effect on the direction of the relationship: studies that employed correlation coefficients showed an increased probability to identify no-effect relationships, whereas descriptive methods had a higher probability of identifying trade-offs. The regional scale was the most commonly considered, and case studies were biased among different land system archetypes which might affect our ability to find the effect of scale or land system archetypes on the pattern of relationships. Our results provide helpful information of which services to include in ecosystem services assessments for the scientific community as well as for practitioners. Furthermore, they allow a first check if critical trade-offs have been considered in an analysis.

*Keywords:* ecosystem services, trade-offs, synergies, relationship of ecosystem services, quantitative review, pairwise analysis of ecosystem services

---

## 1 **1. Introduction**

2       Decision making on resource managements received worldwide attention  
3 in the past decades given the urgent need to preserve ecosystems and find a  
4 sustainable balance between long-term and short-term benefit and costs of  
5 human activities ([Berkes and Folke, 1998](#); [MA, 2005](#); [Carpenter et al., 2009](#);  
6 [Liu et al., 2015](#)). However, a management decision can cause undesirable  
7 consequences if it lacks understanding of the complex nature of ecosystems  
8 which lead to the multi-functionality of land systems ([Holling, 1996](#); [Bennett](#)  
9 [et al., 2009](#)). A land system does not provide only one function but combina-  
10 tions of a variety of overlapping functions ([Bolliger et al., 2011](#), p.203), each  
11 of which provides different ecosystem goods and services to society. Land  
12 systems thus have a potential to provide multiple ecosystem services (ES)  
13 ([Burkhard et al., 2009](#); [Tallis and Polasky, 2009](#); [Mastrangelo et al., 2014](#);  
14 [Schindler et al., 2014](#)). Due to functional trade-offs and synergies among the  
15 different components of this multi-functionality within the land, a decision  
16 potentially influences which services people can get or lose at the same time  
17 ([Wiggering et al., 2006](#); [Paracchini et al., 2011](#)). Therefore, a comprehensive  
18 understanding of the multi-functional land system and of the different ES  
19 derived from it is crucial in natural resource management to avoid undesired  
20 and often unaware trade-offs and to enhance synergies among ES ([Rodríguez](#)  
21 [et al., 2006](#); [Hillebrand and Matthiessen, 2009](#); [Bolliger et al., 2011](#); [Mas-](#)  
22 [trangelo et al., 2014](#)). A key challenge that decision makers face now is to  
23 consider multiple ES and their potential consequences rather than focusing

24 only on a few services in isolation (Cork et al., 2007; Tallis and Polasky,  
25 2009).

26 The concept of multi-functionality has originally been developed at the  
27 landscape scale (Bolliger et al., 2011; Mastrangelo et al., 2014). However, it  
28 can be transferred to larger scales at which parts of the multi-functionality  
29 present at the landscape scale might be hidden due to aggregation effects.  
30 Likewise, the concept can be applied at smaller scales but one has to keep in  
31 mind that some functions might diminish at small scales such as functions  
32 that lead to water regulation, seed dispersal, pollination and pest control  
33 that connect different parts of the landscape. Therefore, interactions across  
34 multiple scales are important to be considered in decision-making.

35 The global research community endeavors to elaborate the concept of ES  
36 both in theory and practice to preserve multiple ES (MA, 2005; Carpenter  
37 et al., 2009). The Millennium Ecosystem Assessment (MA, 2005) has raised  
38 the awareness of the importance of identifying multiple ES and their inter-  
39 actions (Raudsepp-Hearne et al., 2010; Willemsen et al., 2012). The number  
40 of publication has risen rapidly in last decades on this issue (Bennett et al.,  
41 2009). Bennett et al. (2009) stressed the importance of understanding direct  
42 and indirect relationships among multiple ES. Two recent review studies  
43 (Mouchet et al., 2014; Howe et al., 2014) addressed aspects of relationships  
44 between ES. Mouchet et al. (2014) provided a methodological guideline for  
45 assessing trade-offs between ES, whereas Howe et al. (2014) analyzed re-  
46 lationships between ES with a focus of beneficiaries and users. However,

47 both studies did not analyze pairwise relationships between ES, which is a  
48 first step to investigate relationships among multiple ES (Chan et al., 2006;  
49 Raudsepp-Hearne et al., 2010; Jopke et al., 2014). Kandziora et al. (2013)  
50 provided a matrix of pairwise relationships between ES on a conceptual level,  
51 but the relationships between ES have not been studied so far based on case  
52 study results. In this study, we aim at filling this gap with a quantitative  
53 review of relationships between ES based on the published literature.

54 Recent studies focusing on multiple ES have taken several perspectives.  
55 The concept of "bundles" of ES has been commonly applied in the assessment  
56 of provisioning multiple ES in a landscape (e.g. Raudsepp-Hearne et al.,  
57 2010; Martín-López et al., 2013). This approach tries to identify groups of  
58 ES that co-occur repeatedly in landscapes showing patterns of the provision  
59 of ES derived from the different land use and land cover types (Raudsepp-  
60 Hearne et al., 2010; Turner et al., 2014). It is frequently based on a GIS  
61 analysis at the landscape or the regional scale (O'Farrell et al., 2010; Nemeč  
62 and Raudsepp-Hearne, 2012). Often complementary statistical or descriptive  
63 analysis have been used to identify the bundles. Another research line tends  
64 to focus on ecosystem processes and functions that underpin ES (Dickie et al.,  
65 2011; Lavorel et al., 2011). The relationships among multiple ES are either  
66 identified by statistical analysis of field data or by the analysis of the output  
67 process models such as LPJ-GUESS (Smith et al., 2001) or SWAT (Arnold  
68 et al., 1999) see e.g. Lautenbach et al. (2013).

69 Relationships of ES pairs can be categorized into 'trade-off', 'synergy',

70 and 'no-effect'. The term 'trade-off' in ES research has been used when one  
71 service responds negatively to a change of another service (MA, 2005). An  
72 attempt to maximize the provision of a single service will lead to suboptimal  
73 results if the increase of one service happens directly or indirectly at the cost  
74 of another service (Holling, 1996; Rodríguez et al., 2006; Haase et al., 2012).  
75 When both services change positively in the same direction, the relationship  
76 between two ES is defined as synergistic (Haase et al., 2012) - this is often  
77 called also a 'win-win' relationship (Howe et al., 2014). When there is no  
78 interaction or no influence between two ES this is defined as a 'no-effect'  
79 relationship.

80 The relationship between a pair of ES can differ across different scales  
81 and across different socio-ecological systems (Kremen, 2005; Hein et al., 2006;  
82 Bennett et al., 2009). An example for this is the "externality" of a decision  
83 on a certain service as pointed out by Rodríguez et al. (2006): a decision that  
84 seems to influence ES positively for a specific region might cause substantial  
85 trade-offs in areas nearby or faraway (e.g. teleconnection) (Liu et al., 2013).  
86 If the effects of this decision are viewed at a larger scale including all those  
87 negatively influenced areas, the relationship between ES might be charac-  
88 terized by a trade-off. Cimon-Morin et al. (2013) showed in their review  
89 study that the relationship between biodiversity and ES changes with scale  
90 and region. The relationship between carbon storage and habitat was, for  
91 example, described mainly as synergistic at the global scale, but at a finer  
92 scale regions of high biodiversity and high carbon storage might be disjunct

93 leading to a trade-off relationship. Furthermore, the relationship can change  
94 in different land systems. In other word, a decision on increasing a service  
95 can affect the other services differently in different locations. For example,  
96 [Westa et al. \(2010\)](#) showed differences in a trade-off relationship between  
97 carbon sequestration and food provisioning among regions.

98 Given the importance of understanding relationships between ES we con-  
99 ducted a quantitative review on relationships between pairs of ES based on  
100 case studies. We addressed three key hypotheses to investigate the relation-  
101 ships between ES. First, ES pairs show a preferred interaction and relation-  
102 ship with each other; second, this relationship is influenced by the scale at  
103 which the relationship had been studied as well as by the land system; and  
104 third, this relationship is further affected by the method applied to charac-  
105 terize the relationship.

## 106 **2. Material and methods**

### 107 *2.1. Literature search*

108 We carried out a literature search in the ISI Web of Knowledge database  
109 based on combinations of keywords including "ecosystem service\*" or "envi-  
110 ronmental service\*" or "ecological service\*" in the first part, and "trade-off\*"  
111 or "tradeoff\*" or "synerg\*" in the second part of the topic field. We limited  
112 the time period from 1998 to 2013, but decided to include four relevant stud-  
113 ies published in 2014 in addition. Our query resulted in 585 scientific papers.

114 We only included case studies written in English. Studies that did not

115 analyze the relationships between ES were clearly out of scope and therefore  
116 not further considered. If a case study analyzed more than one ES pair, we  
117 considered all pairwise combinations. In total our analysis is based on 67  
118 case studies - with 476 ES pairs.

## 119 *2.2. Database and classification*

120 The ES categories were defined according to the Common International  
121 Classification of Ecosystem Services (CICES) classification V4.3 ([Haines-  
122 Young and Potschin, 2013](#)). CICES is one of the widely applied ES classifica-  
123 tion systems (e.g. Millennium Ecosystem Assessment (MA) ([MA, 2005](#)), Na-  
124 tional Ecosystem Services Classification System (NESCS) and Final Ecosys-  
125 tem Goods and Services Classification System (FECS-CS) by the United  
126 States Environmental Protection Agency ([Landers and Nahlik, 2013](#))), which  
127 has been also practically applied as a basis for the national ecosystem as-  
128 sessment, for example, in Belgium ([Turkelboom et al., 2013](#)), in Germany  
129 ([Naturkapital Deutschland TEEB DE, 2014](#)) and in Finland ([Mononen et al.,  
130 2015](#)). One of its advantages is that it contains a nested hierarchical struc-  
131 ture ([Haines-Young and Potschin, 2013](#)). The highest level of CICES, the  
132 'Section', distinguishes between provisioning, regulating and maintenance,  
133 and cultural services. The next hierarchical levels are 'Division', 'Group',  
134 and 'Class' (Fig 1). The analysis of this study was mainly based on the  
135 'Group' level of CICES (Fig 1, see Supplementary table [ST1](#) for the detailed  
136 list). From now on 'ES' refers to the 'Group' level of ES in CICES unless



137 mentioned.

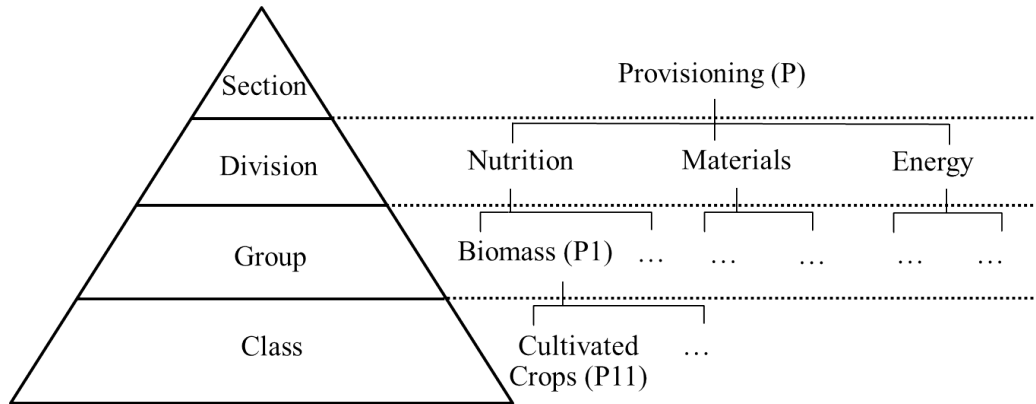

Figure 1: CICES nested hierarchy structure (left) and example of provisioning section and ES code in brackets (adapted from [Haines-Young and Potschin \(2013\)](#))

138 In this study, we focused on the pairwise relationships between ES as de-  
139 scribed in case studies. The relationship between each pair of ES was classi-  
140 fied into three categories: "trade-off", "synergy" and "no-effect". "Trade-off"  
141 was assigned when one service increased with reduction of another service,  
142 whereas when both services interacted positively, "synergy" was assigned.  
143 When there was no interaction between two services, "no-effect" was as-  
144 signed. If the direction of the relationship between the pair of ES was not  
145 clearly described, it was classified as "other".

146 For case studies using correlation coefficients a threshold had to be defined  
147 to distinguish "no-effect" relationships from relevant relationships. There is  
148 no clear vote from the literature about such a threshold in the ES literature.  
149 Applied statistics textbooks agree that a Pearson's correlation coefficient  
150 under 0.35 is characterizing either a negligible ([Hinkel et al., 2003](#)) or a weak

151 relationship (Weber and Lamb, 1970; Mason and Lind, 1983; Taylor, 1990).  
152 In ES literature, however, a Pearson's correlation coefficient of 0.2 is often  
153 considered as a meaningful correlation (e.g. Chan et al., 2006; Jopke et al.,  
154 2014). In this study, we assigned the "no-effect" label to relationships with  
155 a correlation coefficient between -0.25 and 0.25.

156 It was even more difficult for case studies using multivariate statistics to  
157 set a threshold to distinguish a "no-effect" relationship from a synergistic or  
158 trade-off relationship. The square of the factor loadings is the proportion of  
159 variance in each of the items (the observed traits) explained by the factor  
160 (the unobserved trait). For example, the factor loading of 0.32 is equivalent  
161 to 10% explained variance (Tabachnick and Fidell, 1989). In this study, we  
162 used a threshold: if the loading was reported and it was greater than 0.32,  
163 the relationship was identified according to the direction (+ for "synergy" or  
164 - for "trade-off") over the different factors or PCs. When the loading was too  
165 small, "no-effect" was assigned. When the loading was not reported at all  
166 and only the bi-plot was reported from the study, the direction of variables  
167 (+ for "synergy" or - for "trade-off") was considered for the relationship.

168 The dominant relationship for each pair of ES was determined based on  
169 the relative importance of each relationship category. The ratio of studies  
170 in the dominant relationship category (Eq. 1) was calculated across all case  
171 studies – the category with the highest ratio was assigned as the dominant  
172 relationship for each pair of ES. We used the term "level of agreement" to  
173 describe the certainty of relationships from the case studies.

174 The level of agreement of a pair of  $ES_i$  and  $ES_j$  is calculated as

$$\text{Level of agreement}_{i,j} = \max(\text{obs}_{i,j,k}) / \sum_k (\text{obs}_{i,j,k}) \times 100, \quad (1)$$

175 where  $\text{obs}_{i,j,k}$  is the number of observations for the pair of  $ES_i$  and  $j$  in  
176 the relationship category  $k$ . The higher the level of agreement for a pair of  
177 ES, the higher the percentage of studies that showed the same direction of  
178 relationship. If there was a tie between two or three categories for a pair or if  
179 the level of agreement did not exceed 50%, we assigned the pair to the "not  
180 decided" category.

181 The spatial scale of the case study was determined following the criteria  
182 provided by [Martínez-Harms and Balvanera \(2012\)](#) (Table 1) according to  
183 the size of the study area. The land system in which a case study took  
184 place was assigned according to the map of land system archetype (LSA) of  
185 [Václavík et al. \(2013\)](#) that matched the location of the study site. The LSA  
186 is a classification schemes of land systems based socio-economic, ecological  
187 and land use intensity factors ([Václavík et al., 2013](#)). When several LSAs  
188 overlapped within a study area, the dominant LSA was assigned if it covered  
189 more than 50% of the study area. Otherwise, all LSAs were considered - at  
190 maximum three LSAs were assigned to one pair of ES.

191 We differentiated between the method used to quantify ES (preparation  
192 of the results) and the method used to identify the relationship between the  
193 ES (analysis of the results). We only considered the latter in the analysis.

194 If, for example, a study used GIS modeling to quantify ES and described  
195 the relationship between ES - based on the GIS analysis - qualitatively, we  
196 categorized the method for this pair as “descriptive“. The method used  
197 to identify the relationship was categorized into five groups: ”descriptive”,  
198 ”correlation”, ”regression analysis”, ”multivariate statistics“, and “other“  
199 (Table 1).

### 200 *2.3. Statistical Analysis*

201 To test our hypotheses that the scale, the LSA as well as the method used  
202 affect the dominant relationship of ES, we applied two statistical analyses. In  
203 the first step we focused on the overall pattern of relationships between pairs  
204 of ES. In the second step we tested each pair of ES separately for effects of  
205 scale, the LSA and the method used. Subsets of the data were prepared for  
206 each category of scale, LSA and method (Table 1). The minimum number of  
207 case studies to participate in the comparison was set to 10 for each subset.  
208 We combined the national, the continental and the global scale into one  
209 category, “large scale“, due to the limited number of case studies in these  
210 categories. Among 12 LSAs, only three LSAs (i.e. “boreal systems of the  
211 western world“ (LSA3), “extensive cropping systems“ (LSA7), and “intensive  
212 cropping systems“ (LSA10)) satisfied this threshold to participate in the  
213 comparison. The method used could not be performed for the overall pattern  
214 analysis due to the limited number of case studies in the categories.

215 In the first step we tested the null hypothesis that the overall structure

Table 1: Criteria used for classification

| Criteria      | Categories              | Rationale                                                                                                                                                   | Reference                                           |
|---------------|-------------------------|-------------------------------------------------------------------------------------------------------------------------------------------------------------|-----------------------------------------------------|
| Spatial Scale | Patch                   | $10\text{-}10^2 \text{ km}^2$                                                                                                                               | <a href="#">Martínez-Harms and Balvanera (2012)</a> |
|               | Local                   | $10^2\text{-}10^3 \text{ km}^2$                                                                                                                             |                                                     |
|               | Regional                | $10^3\text{-}10^5 \text{ km}^2$                                                                                                                             |                                                     |
|               | National                | $10^5\text{-}10^6 \text{ km}^2$                                                                                                                             |                                                     |
|               | Global <sup>a</sup>     | $> 10^6 \text{ km}^2$                                                                                                                                       |                                                     |
| Archetype     | LSA 1                   | Forest systems in the tropics                                                                                                                               | <a href="#">Václavík et al. (2013)</a>              |
|               | LSA 2                   | Degraded forest/crop land systems in the tropics                                                                                                            |                                                     |
|               | LSA 3                   | Boreal systems of the western world                                                                                                                         |                                                     |
|               | LSA 4                   | Boreal systems of the eastern world                                                                                                                         |                                                     |
|               | LSA 5                   | High-density urban agglomerations                                                                                                                           |                                                     |
|               | LSA 6                   | Irrigated cropping systems with rice yield gap                                                                                                              |                                                     |
|               | LSA 7                   | Extensive cropping systems                                                                                                                                  |                                                     |
|               | LSA 8                   | Pastoral systems                                                                                                                                            |                                                     |
|               | LSA 9                   | Irrigated cropping systems                                                                                                                                  |                                                     |
|               | LSA 10                  | Intensive cropping systems                                                                                                                                  |                                                     |
|               | LSA 11                  | Marginal lands in the developing world                                                                                                                      |                                                     |
|               | LSA 12                  | Barren lands in the developing world                                                                                                                        |                                                     |
| Method        | Descriptive             | Qualitative description without any explicit quantitative measures                                                                                          |                                                     |
|               | Correlation             | Measures of the degree of statistical dependency between two variables such as Pearson's correlation coefficient or Spearman's rank correlation coefficient |                                                     |
|               | Regression analysis     | Regression analysis such as (generalized) linear models                                                                                                     |                                                     |
|               | Multivariate statistics | Analysis of pattern in multidimensional data without assuming a dependent variable such as PCA, cluster and factor analysis                                 |                                                     |
|               | Other                   | The relationship between ES was already built in the quantifying ES process                                                                                 |                                                     |

<sup>a</sup> When a study considered a certain continent (e.g. Europe), we considered it as a continental scale.

216 of the relationships between ES pairs was independent of scale and LSA. To  
217 compare the outcomes of different subsets of scales and LSAs, a bootstrap  
218 approach (Efron and Tibshirani, 1994) was used. The subset membership was  
219 permuted at the case study level during the bootstrap because case studies  
220 often analyzed multiple pairs of ES leading non-independence between ES  
221 pairs from the same case study. For each bootstrap sample a measure of  
222 similarity between the original data and the permuted subset was calculated.  
223 As the measure of similarity, the Euclidean distance between the two subsets  
224 of ES relationships normalized by the total number of ES pairs in the subset  
225 was used. This allowed us to test the null hypothesis that both subsets belong  
226 to the same underlying distribution.

227 Afterwards, we tested each pair of ES separately for effects of scale, the  
228 LSA and the method based on the contingency table. After the contingency  
229 table for each pair was created, we fitted generalized linear model with a  
230 Poisson distribution for a model with the number of elements in a category  
231 as the response and the type of relationships and scales, LSAs or the methods  
232 as predictors. We tested for the significance of the differences of deviances  
233 by comparing the saturated model which contained the interaction between  
234 both factors to the model with just the main effects (Faraway, 2005). Since  
235 this analysis can only be applied for pairs studied at all scales or LSAs, we  
236 were only able to analyze 14 pairs of ES with respect to effects of scale. For  
237 the effect of LSA none of pairs was studied in all 12 LSAs. Therefore, we  
238 tested for the pairs which were studied in multiple LSAs: this led to the

239 analysis of 19 ES pairs. The analysis of the effect of the method used to  
240 identify the type of relationship was done at the level of the case studies  
241 and not at the ES pair level since case studies typically applied the same  
242 method. We excluded the "other" category for the analysis. All analyses  
243 were performed using R version 3.2.0 (R Core Team, 2015).

### 244 **3. Results and Discussions**

#### 245 *3.1. Empirical pattern of the relationships between ecosystem services*

246 Among the 48 types of ES defined at the class level in CICES, 33 -  
247 including one abiotic service (i.e. renewable abiotic energy source) - were  
248 found in our data set (Fig 1, Supplementary table ST1). The most studied ES  
249 class was "global climate regulation service" (n = 114) followed by "cultivated  
250 crops" (n = 103), "physical use of landscape" such as hiking (n = 93), and  
251 "maintaining nursery population and habitats" (n = 85). We found 207  
252 different combinations of ES at the CICES class level (Fig 1). More than  
253 half of those combinations at the class level (n = 105) were, however, recorded  
254 only one time. Since this did not provide enough support to analyze patterns,  
255 we decided to drop the analysis at the class level. At the group level in CICES  
256 94 types of combinations of ES pairs were analyzed (Fig 1, Supplementary  
257 table ST1). A pair of two ES that belonged to the same CICES group but to  
258 different CICES classes was analyzed as well. Figure 2 shows the empirical  
259 pattern of pairwise relationships between ES groups – non-empty cells at the  
260 main diagonal refer to pairs of ES classes that belong to the same CICES

261 group. To the best of our knowledge, this is the first study in which such a  
262 comprehensive matrix of relationships between ES has been compiled based  
263 on case study results.

264 The number of observations available to identify the dominant relation-  
265 ship ranged between 1 and 29. Twenty-one types of pairs of ES at the group  
266 level were observed only one time and more than half of the pairs ( $n = 61$ )  
267 were supported by less than 5 observations. Only 12% of the pairs were sup-  
268 ported by more than 10 observations. The most studied pair of ES at the  
269 group level was the pair “atmospheric composition and climate regulating“  
270 (R10) and “biomass provisioning“ (P1) services with 29 observations.

271 The level of agreement ranged from 25% to 100% (Fig 3). For 74% of  
272 the pairs, the level of agreement to determine the dominant relationship was  
273 higher than 50% – the other pairs were assigned to the “not decided“ category  
274 ( $n=24$ ).

275 The relationship between regulating services was dominated by a syn-  
276 ergistic relationship, which means that regulating services are likely to in-  
277 crease if a management action increases other regulating services. On the  
278 other hand, provisioning services and regulating services tended to trade-offs  
279 (Fig 2), which means that when a provisioning service increases, a regulating  
280 service is likely to decrease and vice versa. Cultural services showed a trend  
281 for synergistic effects mainly with other cultural and regulating services, and  
282 a no-effect relationship with provisioning services. Note that this pattern of  
283 relationships shown here does not necessarily imply causality.



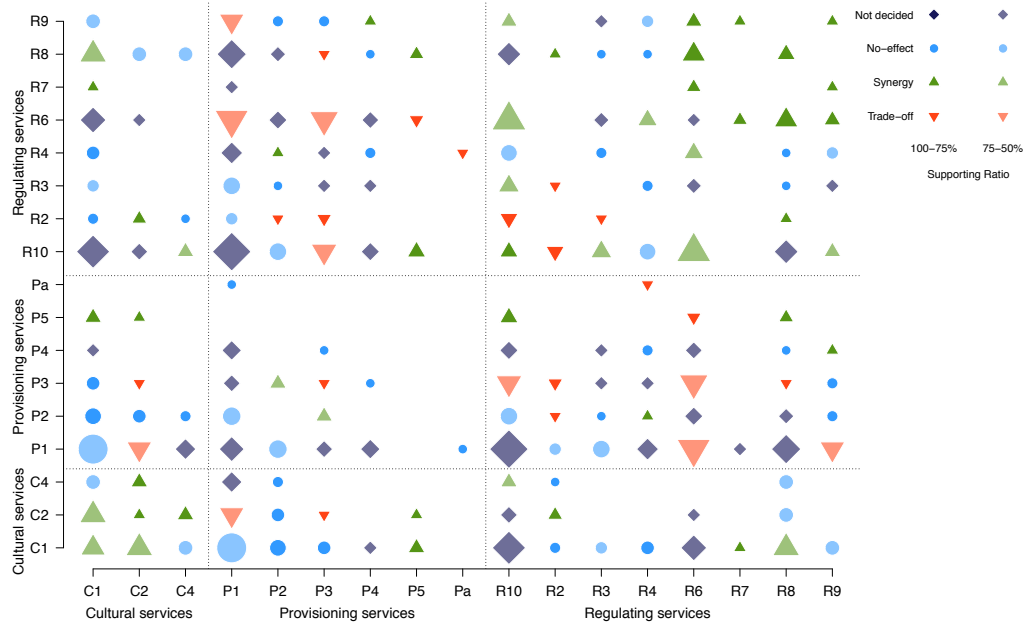

Figure 2: Result from analysis of 67 case studies with 476 pairs of ecosystem services, showing the empirical pattern of relationships between them. X and Y axis represent the ecosystem service classification code used in the analysis. The size of the symbol indicates the square root scaled number of studies. The color intensity represents the level of agreement. C: Cultural services, P: Provisioning services, R: Regulating services. C1: Physical and experiential interactions, C2: Intellectual and representative interactions, C4: Existence and bequest, P1: Biomass provisioning, P2: Water provisioning, P3: Materials for production and agricultural uses, P4: Water provisioning (i.e. non-drinking purpose), P5: Energy, Pa: Abiotic provisioning, R10: Atmospheric composition and climate regulation, R2: Mediation by ecosystems, R3: Mass flows regulation, R4: Liquid flows regulation, R6: Life cycle maintenance, habitat and gene pool protection, R7: Pest and disease control, R8: Soil formation and composition regulation, R9: Water condition

284 *3.1.1. Trade-off dominated relationships*

285 The level of agreement for the trade-off relationships ranged between 54%  
 286 and 100%. The most agreed trade-off relationship among those pairs with

287 more than 5 observations was “biomass for production such as timber and  
288 fodder“ (P3) and “atmospheric composition and climate regulation“ (R10)  
289 with a level of agreement of 75% (n=8). On the one hand forests are impor-  
290 tant in terms of carbon fixation and storage, but on the other hand they are  
291 in many land systems used for timber production. In this case, a decision on  
292 how long forests are kept as carbon sinks or when trees are cut to be used for  
293 timber production generates trade-offs. Different forest management schemes  
294 influence the type of services from which people obtain benefits, which gen-  
295 erates such trade-off among them (Backéus et al., 2005; Seidl et al., 2007;  
296 Olschewski et al., 2010).

297 A clear agreement on a trade-off relationship was also found for the rela-  
298 tionship between the pair of “life cycle maintenance, habitat and gene pool  
299 protection“ (R6) and “food provisioning“ services (P1) with a level of agree-  
300 ment 72% (n=18). Previous studies pointed out a negative relationship be-  
301 tween agricultural intensity and natural habitat (Mattison and Norris, 2005;  
302 Reidsma et al., 2006; Phalan et al., 2011). In order to compensate the loss  
303 of habitat in agricultural areas, more sustainable farming managements were  
304 often suggested (Altieri, 1999; Landis et al., 2000; Altieri, 2004; Lichtfouse  
305 et al., 2009) such as organic farming, which promises to increase ES nursery  
306 and habitat protection. However, there are doubts whether this allows pro-  
307 ducing sufficient food to feed the world population (Bengtsson et al., 2005;  
308 Zhang et al., 2007; de Ponti et al., 2012). Organic farming was found to in-  
309 crease species richness by providing better habitats and nursing ES (Bengts-

310 [son et al., 2005](#)), but at the same time, meta-analyses showed that crop  
311 yield could be lowered by up to 20-34% compared to conventional farming  
312 ([de Ponti et al., 2012](#); [Seufert et al., 2012](#)).

313 However, "pollination and seed dispersal" (R61) in the CICES class level,  
314 which belongs to "life cycle maintenance, habitat and gene pool protection"  
315 (R6) in the CICES group level, showed a synergistic relationship (e.g. [Boreux](#)  
316 [et al., 2013](#)). Overall 35% of the global production comes from crops that  
317 depend on animal pollinators ([Klein et al., 2007](#)), which might lead to a syn-  
318 ergistic relationship between food provisioning and habitat protection ([Aizen](#)  
319 [et al., 2008](#); [Lautenbach et al., 2012](#); [Garibaldi et al., 2013](#)). It was not seen  
320 at the aggregated group level of CICES due to the limited number of case  
321 studies on R61.

### 322 *3.1.2. Synergy dominated relationships*

323 The level of agreement for synergistic relationships varied between 55%  
324 and 100% (Fig. 3). The strongest synergistic relationship was found in the  
325 group of regulating services. Especially "habitat and gene pool protection  
326 services" (R6) showed a clear synergistic relationship with most other regulat-  
327 ing services. Regulating services have been described as generally associated  
328 with ecosystem processes and functions ([Kremen, 2005](#); [Bennett et al., 2009](#);  
329 [de Groot et al., 2010](#)) and mostly positively related to biodiversity ([Balvan-](#)  
330 [era et al., 2006](#); [Mace et al., 2012](#); [Harrison et al., 2014](#)). [de Groot et al.](#)  
331 (2002) defined "habitat and gene pool protection services" (R6) as a basis

332 for other functions, which is in line with its observed synergistic relationship  
333 with other regulating services. The synergistic relationship between “habi-  
334 tat and gene pool protection services“ (R6) and “soil formation regulating  
335 services“ (R8) with a high level of agreement (88%) has been reported by  
336 studies that emphasized the interactions between soil functions and the role  
337 of soils in living habitats (e.g. [Young and Ritz, 2000](#); [Crawford et al., 2005](#);  
338 [de Groot et al., 2010](#); [Larvelle, 2012](#)).

339 Another relatively strong synergistic relationship was found among the  
340 group of cultural services. Among pairs of cultural services, four out of five  
341 showed a dominant synergistic relationship. This is in line with findings from  
342 [Daniel et al. \(2012\)](#) on interrelationships between cultural service categories  
343 such as aesthetic services that contribute to the provisioning of recreation  
344 services, which leads to the synergistic relationship between them.

### 345 *3.1.3. No-effect dominated relationships*

346 The level of agreement for no-effect relationships varied between 52% and  
347 100%. The dominant no-effect relationship was found between provisioning  
348 and cultural services. Among pairs of provisioning and cultural services, ”wa-  
349 ter provisioning service“ (P2) and “physical and experimental interactions“  
350 (C1) was the most agreed no-effect relationship with a level of agreement of  
351 100% (n = 7)

352 The dominant no-effect relationship between provisioning and cultural  
353 services could be explained by common drivers ([Bennett et al., 2009](#)) and dif-

354 ferent land use designs when the services occur in different locations ([Raudsepp-](#)  
355 [Hearne et al., 2010](#)). [Bennett et al. \(2009\)](#) proposed “common drivers“ to  
356 understand relationships between ES. For example, introducing agricultural  
357 tourism by allowing people to watch the production process increases cul-  
358 tural services, but does not affect the amount of the agricultural production  
359 ([Bennett et al., 2009](#), p.4). In this case, cultural and provisioning services  
360 do not share a common driver, therefore the relationship between them is  
361 no-effect. Another explanation for the no-effect relationship between provi-  
362 sioning and cultural services would be that cultural services such as tourism  
363 and cultural heritage are often captured in protected areas (e.g. national  
364 parks) where no production activity would be allowed (e.g. [Martín-López](#)  
365 [et al., 2007](#); [Raudsepp-Hearne et al., 2010](#)). However, there was a disagree-  
366 ment on this relationship. [Rodríguez et al. \(2006\)](#) described the relationship  
367 between provisioning and cultural services as a ‘trade-off’ relationship – forest  
368 management for timber production could for example discourage recreational  
369 visits to this forest. It might depend on the types of ES whether they share  
370 a common driver or location to derive synergies or trade-offs.

371 Here we note that the types of cultural services that were covered in the  
372 analysis were rather limited; 69% of those case studies that analyzed cultural  
373 services focused on “physical and experimental interactions“ (C1), whereas  
374 “spiritual services“ (C3) were not considered at all in the studies analyzed.

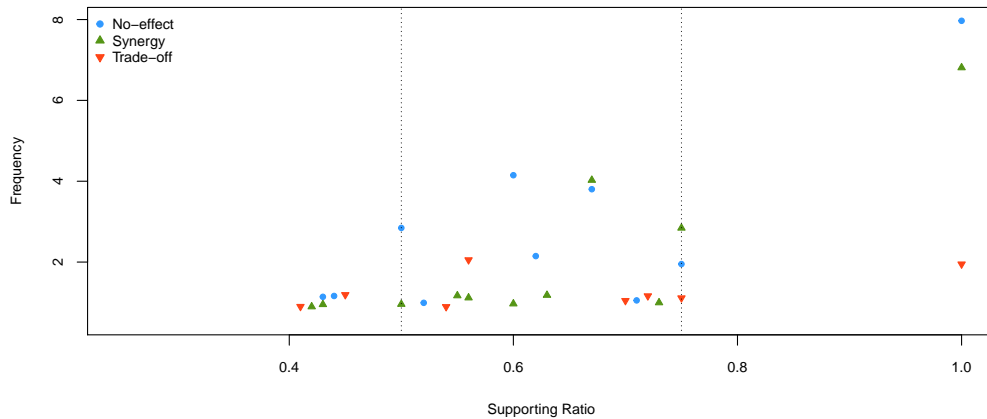

Figure 3: The distribution of the level of agreement (jittered for clarity) to determine the dominant relationship excluding pairs with a single observation. The shape of symbols indicates the dominant relationship.

375 *3.1.4. Sensitivity of the pattern towards changes in the threshold of the level*  
376 *of agreement*

377 To determine the dominant relationship, we used 50% as a threshold for  
378 the level of agreement (Eq. 1) following majority rule. If the threshold was  
379 raised up to 70%, about 20% of pairs of ES were influenced by the decision  
380 and changed to the “not decided“ category (see Table 2 and Fig 3). However,  
381 the overall direction of the dominant relationships between groups of ES (i.e.  
382 the “section“ level of ES (Fig 1)) did not change thereby. See Supplementary  
383 Figure SF4 where we present the relationship matrix of pairs of ES with the  
384 threshold 70%.

Table 2: The number of pairs of ecosystem services in each category of relationships under the 50% and 70% threshold conditions.

|               | <b>Trade-off</b> | <b>Synergy</b> | <b>No-effect</b> | <b>Not decided</b> |
|---------------|------------------|----------------|------------------|--------------------|
| 50% threshold | 13               | 33             | 24               | 20                 |
| 70% threshold | 10               | 24             | 16               | 40                 |

385 *3.1.5. Sensitivity of the pattern towards the analysis at the CICES group level*

386 Results might be potentially influenced by using the CICES group level  
387 for the analysis. However, we assume that only a single “not-decoded“ pair  
388 has to be considered as an artifact from the aggregation of ES at the CI-  
389 CES group level (Fig 1): the pair of “physical and experiential interactions“  
390 (C1) and “soil formation and composition“ (R8). While most case studies  
391 for this pair were conducted at the same scale and in the same LSA using  
392 the same methodology, the direction of the relationship was different across  
393 the case studies. Six observations were synergistic, whereas five observa-  
394 tions were identified as no-effect. All no-effect relationships were observed in  
395 “physical activities such as hiking and leisure fishing“ (C12), whereas four  
396 among six synergy relationships were observed in “experiential use such as  
397 bird watching“ (C11) at the class level in CICES (Fig 1).

398 Except this one case it was not possible to use the class level of CICES  
399 for the analysis due to the limited number of observations at this level. Our  
400 analysis at the group level in CICES provides an overall pattern of relation-  
401 ships over 94 pairs of ES. Furthermore, to our knowledge, the analysis of  
402 relationships between ES at the group level was rarely done before. Previous

403 review studies provided results at a section level in CICES (e.g. provision-  
404 ing, regulating, cultural services) (Rodríguez et al., 2006), or based only on  
405 examples (Bennett et al., 2009).

### 406 *3.2. Scale and land system archetypes of ecosystem service pairs*

407 The bootstrap approach did not reveal any significant difference between  
408 subgroups of the case studies based on scale or LSA. Neither spatial scale  
409 nor LSA membership had a significant influence on the overall pattern of the  
410 relationships between the services – p-values for each test are given in the  
411 Supplementary table ST3 and ST4.

412 The spatial scale of the studies was spread unevenly. The regional scale  
413 was most frequently studied (38%), followed by the plot scale (22%) and  
414 the continental scale (10%). The global scale was the least studied (6%)  
415 (Supplementary figure SF2). Forty-one pairs of ES (44%) were studied only  
416 at a single type of scale, which hindered the comparison of the relationship  
417 pattern among scales.

418 Among the 14 pairs of ES that were included in the contingency analysis,  
419 significant differences across scale were only identified for two pairs of ES:  
420 the pair of "soil formation and composition regulation" (R8) and "biomass  
421 provisioning" (P1) ( $p = 0.0067$ ) and the pair of "soil formation and composi-  
422 tion regulation" (R8) and "atmospheric composition and climate regulation"  
423 (R10) ( $p = 0.0321$ ). Both pairs included "soil formation and composition  
424 regulation" (R8). The result for both pairs showed a synergistic relationship



425 at the small scale, whereas at the larger scale, the relationship was no-effect  
426 and not-decided for the pair of R8 and P1, and the pair of R8 and R10, re-  
427 spectively. "Soil formation and composition regulation" (R8) are generally  
428 considered not only as a direct driver for enhancing "biomass provisioning"  
429 (P1) in agricultural lands (Hobbs et al., 2008), but also as an indirect driver  
430 for enhancing carbon and nutrient cycling which can influence "atmospheric  
431 composition and climate regulation" (R10) by affecting biotic processes (van  
432 Breemen, 1993; Barrios, 2007). This synergistic role of "soil formation and  
433 composition regulation" (R8) was often studied in experiments at a finer scale  
434 (Six et al., 2000; Hobbs et al., 2008). At a larger scale, this relationship did  
435 not clearly appear – e.g. Jopke et al. (2014) showed a no-effect relationship  
436 at the continental scale.

437 In addition, there was only one pair which was considered at every scale.  
438 The results at each scale showed different relationships but the result was  
439 not statistically significant ( $p = 0.4213$ ). It was the pair of "atmospheric  
440 composition and climate regulation" (R10) and "biomass provisioning" (P1):  
441 at the small scale (i.e. the plot, local scale) the dominant result was synergy  
442 (50%;  $n=3$ ), whereas it was trade-off (54%;  $n=6$ ) at the regional scale and  
443 no-effect (46%;  $n=5$ ) at the large scale (national, continental and global).

444 Case studies were also unevenly distributed across LSAs (Supplementary  
445 figure SF3): only three types of LSAs (i.e. "boreal systems of the western  
446 world" (LSA3), "extensive cropping systems" (LSA7), and "intensive crop-  
447 ping systems" (LSA10)) among 12 were studied in more than 10 case stud-

448 ies. A geographical bias of the distribution of ES case studies was already  
449 stressed by Seppelt et al. (2011). The land system “boreal systems of the  
450 eastern world“ (LSA4), “high-density urban agglomerations“ (LSA5), and  
451 “irrigated cropping systems with rice yield gap“ (LSA6) were not at all con-  
452 sidered in the case studies. Thirty-two pairs of ES (34%) were studied at a  
453 single LSA. LSA10 was most frequently observed when only a single type of  
454 LSA was considered. At maximum, seven LSAs were considered for a pair  
455 of ES, the pair of “atmospheric composition and climate regulation“ (R10)  
456 and “life cycle maintenance, habitat and gene pool protection“ (R6).

457 While the overall pattern of relationships between ES at the group level  
458 was indifferent to LSA, a few ES pairs showed interesting differences across  
459 LSAs from the contingency analysis. The relationship for the pair of “life  
460 cycle maintenance, habitat and gene pool protection“ (R6) and “atmospheric  
461 composition and climate regulating“ (R10) showed significantly different  
462 across the LSAs ( $p = 0.0269$ ): synergy in “forest systems in the trop-  
463 ics“ (LSA1), “extensive cropping systems“ (LSA7), and “intensive crop-  
464 ping systems“ (LSA10), no-effect in “irrigated cropping system“ (LSA9) and  
465 “marginal lands in the developed world“ (LSA11), and not decided in “boreal  
466 systems of the western world“ (LSA3). Stored carbon in vegetation and soil  
467 was generally measured to quantify climate regulating services (R10) in ev-  
468 ery LSA. However, for “habitat protection services“ (R6) different approaches  
469 were used in different LSAs. A possible explanation is that in “forest systems  
470 in the tropics“ (LSA1) and “extensive cropping system“ (LSA7) species rich-

471 ness as well as carbon sequestration are positively influenced by the presence  
472 of forest instead of arable land areas, while in “irrigated cropping system“  
473 (LSA9) and “marginal land“ (LSA11) such a clear common driver is miss-  
474 ing. Other pairs which differed significantly across LSAs were the pair of  
475 ”existence and bequest” (C4) and “biomass provisioning“ (P1) ( $p = 0.0152$ )  
476 and the pair of “biomass provisioning“ (P1) and ”Water provisioning (i.e.  
477 non-drinking purpose) ” (P4) ( $p = 0.0331$ ).

### 478 *3.3. Methods used to determine the relationship*

479 The results from the difference of deviance test showed that the influence  
480 of the choice of methods applied on the direction of the results was marginally  
481 significant ( $p = 0.0294$ ). Correlation coefficient methods showed a higher  
482 probability to identify a no-effect relationship, whereas descriptive methods  
483 showed a higher probability to identify a trade-off relationship and less no-  
484 effect relationships. Multivariate statistics showed less no-effect relationships  
485 (Fig 5 and Fig 4).

486 It was problematic for case studies using multivariate statistics to set a  
487 threshold to distinguish ”no-effect”. While it is possible to identify thresh-  
488 olds for the strength of the relationship based on the loadings in PCA or  
489 factor analysis as well as for the uncertainty of assigning an ES to a cluster,  
490 this was rarely done in practice. Multivariate statistics were frequently ap-  
491 plied in trade-off of ES researches to identify bundles of ES by using PCA  
492 or factor analysis in order to find ES that tend to occur together (e.g. La-

493 [vorel et al., 2011](#); [Maes et al., 2012](#)). However, without an agreed threshold  
494 within ES research communities, using multivariate statistics to define rela-  
495 tionships between ES might lead to ignorance of no-effect relationship. Since  
496 the assignment of ES to different bundles does typically neither include the  
497 strength of the association nor the attached uncertainty, no-effect relation-  
498 ships might be undetectable by the approach. Correlation approaches make  
499 it easier to define no-effect relationships based on the absolute strength of  
500 the correlation. If the correlation is stronger than a threshold, significance  
501 of the correlation should be tested – potentially corrected for nuisances such  
502 as spatial auto-correlation ([Dormann et al., 2007](#)).

503 Regression type I models were frequently used to describe the relationship  
504 between ES. From a theoretical point of view, the use of a regression type  
505 I model seems questionable to describe relationships between ecosystem ser-  
506 vices since the approach distinguishes ecosystem services into dependent and  
507 independent variables - errors are only considered for the dependent variable  
508 not for the independent variables. Only regression type II models ([Legendre  
509 and Legendre, 2003](#)) - which have not been used in the case studies-, in which  
510 errors for both predictors and response are considered seem appropriate to  
511 model ES relationships.

512 Methods were evenly distributed across the types of pairs of ecosystem  
513 services and across the scales. In other word, the decision on which types of  
514 method to use to define the relationship was neither influenced by the type  
515 of ecosystem services nor by the scale of the study.

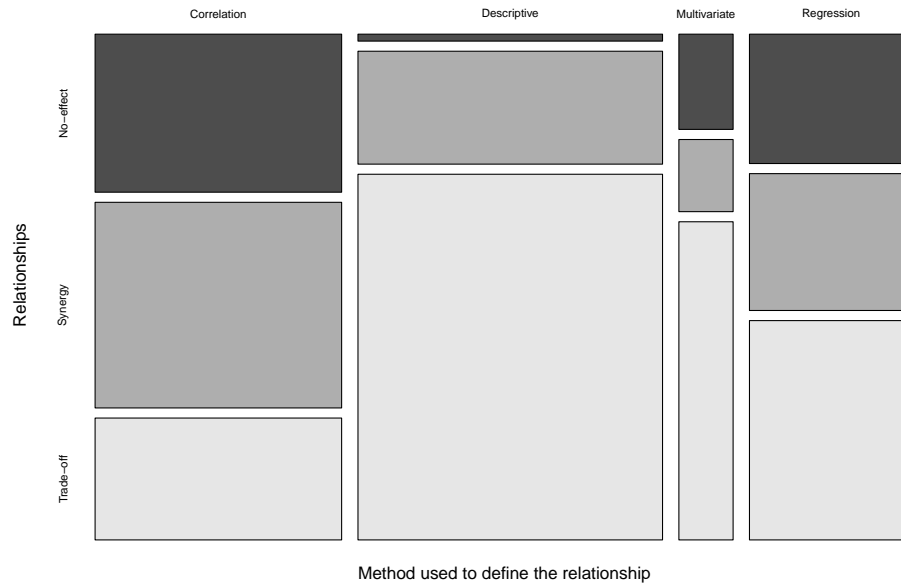

Figure 4: Mosaic plot for method used and the relationships between two ecosystem services

516 It has been already reported (Vatn and Bromley, 1994; Jacobs, 1997;  
517 Martín-López et al., 2013) that the choice of the method to value ES can  
518 bias results. We emphasize here that not only valuation methods but also  
519 method used to define relationships should be chosen with a care. Researchers  
520 should be aware that their decision on methods used might limit the result  
521 in a certain direction.

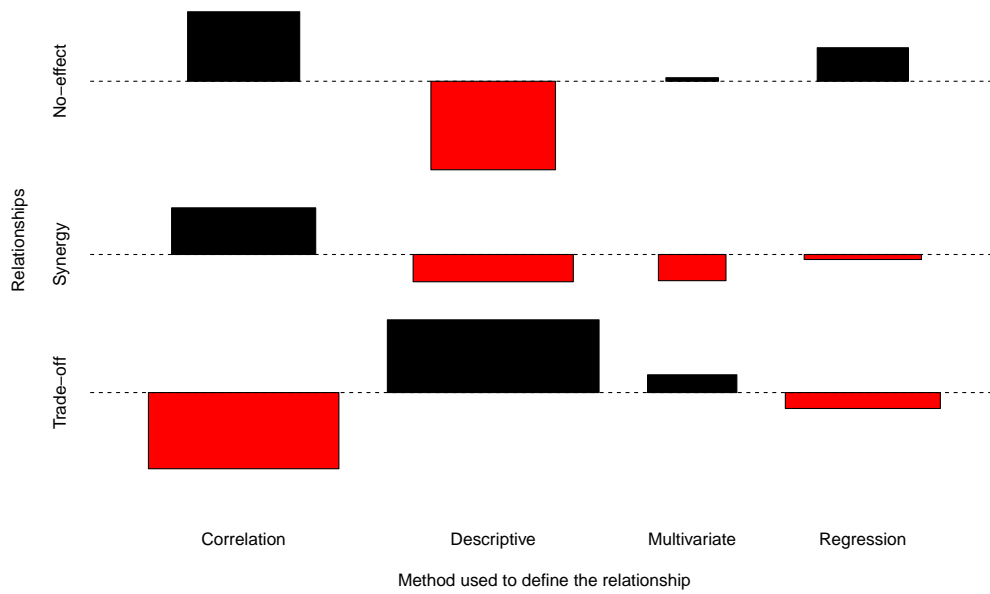

Figure 5: Association plot for method used in the relationships between two ecosystem services

522 *3.4. Further limitations*

523       Although our review was comprehensive and thoroughly conducted, we  
524 imposed constraints on our review that might have biased our result. We  
525 only considered peer-reviewed scientific articles written in English found in  
526 Web of Knowledge for our analysis. This might have excluded some pairs of  
527 ES that are only considered for a certain region in gray literature. However,  
528 using non peer-reviewed literature has the drawback that quality standards  
529 are lower (Pullin and Stewart, 2006; Nieto-Romero et al., 2014; Harrison  
530 et al., 2014).

531 **4. Conclusions**

532       Comprehensive information is required for well-informed policy decisions  
533 which do not ignore side-effects in multi-functional land systems. However,  
534 this information is often expensive and difficult to obtain. The missing in-  
535 formation can directly and indirectly influence the policy decision as well as  
536 its impact on multi-functional land systems, and therefore human well-being  
537 (OECD, 2003). The fundamental challenge in practice is to minimize the  
538 inefficient and inappropriate impacts on provisioning of multiple ES by en-  
539 hancing understanding of multi-relationships between ES. Making this infor-  
540 mation more explicit and accessible is more likely to drive at more balanced  
541 conditions (Carpenter et al., 2009).

542       In this study, we tried to fill the knowledge gap on relationships between  
543 ES by a synthesis of relationships between ES studied in published case

544 studies. We identified typical relationships between a number of pairs of  
545 ES. To the best of our knowledge, this is the first study in which such a  
546 comprehensive matrix of relationships between ES has been compiled. Our  
547 results provide an overview of relationships of ES studied so far together with  
548 the information on the level of agreement between study results. This equips  
549 practitioners with a practical summary to examine the underlying impacts  
550 of their decision in advance. Furthermore, our results might highlight pairs  
551 of ES for which more input is needed from the scientific community. The  
552 results might help further during the design of research programs and give  
553 important hints for decision makers and reviewers to check research plans  
554 and to ask critical questions with respect to research outcomes. If important  
555 relationships between ES could not be studied, our analysis might provide  
556 hints on the direction of the neglected effect.

557 While we were able to show that for a few pairs of ES the dominant  
558 relationship changed as a function of scale or of land system, we were not  
559 able to show this for the majority of cases. The limited number of case  
560 studies and the uneven distribution across ES groups, scales and land system  
561 archetypes is a potential explanation for it. Therefore, we encourage the  
562 development of a research agenda that allows filling those gaps to come to a  
563 more complete picture on relationships between different ES. Being able to  
564 predict the direction of a relationship between ES as a function of scale and  
565 land system would be an important step for decision support and ecosystem  
566 management but it would be by no means the end of the research agenda.



567 We need higher quality studies that follow good modeling practice or analyze  
568 their data properly, reporting uncertainties along with point estimates, more  
569 evenly spread across the scales and land systems which reports not only  
570 the direction but also the strength of the relationship in a comparable way.  
571 Bundle analysis based on an overlay of relatively simple GIS tools presumably  
572 would not fulfill high quality standards and should be therefore treated with  
573 care. Based on the results of such data, a next step would be the performance  
574 of a meta-analysis to untangle more details on ES relationships.

## 575 **Acknowledgements**

576 This project was funded by the EU FP-7 project OPERAs (grant number  
577 308393). We acknowledge stimulating discussions with our project partners  
578 during the project meetings. We would like to thank Kimberly A. Nicholas,  
579 Stefan Schmidt, Sina Berger and Daniela Braun for valuable comments on  
580 an earlier version of the manuscript.

## 581 **References**

- 582 Aizen, M.A., Garibaldi, L.A., Cunningham, S.A., Klein, A.M., 2008. Long-  
583 term global trends in crop yield and production reveal no current polli-  
584 nation shortage but increasing pollinator dependency. *Current Biology*  
585 18(20), 1572–1575. doi:[10.1016/j.cub.2008.08.066](https://doi.org/10.1016/j.cub.2008.08.066).
- 586 Altieri, M.A., 1999. The ecological role of biodiversity in agroecosystems.  
587 *Agriculture, Ecosystems and Environment* 74, 19–31.

- 588 Altieri, M.A., 2004. Linking ecologists and traditional farmers in the search  
589 for sustainable agriculture. *Frontiers in Ecology and the Environment* 2,  
590 35–42. doi:[10.1890/1540-9295\(2004\)002\[0035:LEATFI\]2.0.CO;2](https://doi.org/10.1890/1540-9295(2004)002[0035:LEATFI]2.0.CO;2).
- 591 Arnold, J.G., Srinivasan, R., Muttiah, R.S., Allen, P.M., 1999. Continental  
592 scale simulation of the hydrologic balance. *Journal of the American Water*  
593 *Resources Association* 35(5), 1037–1051.
- 594 Backéus, S., Wikström, P., Lämås, T., 2005. A model for regional analy-  
595 sis of carbon sequestration and timber production. *Forest Ecology and*  
596 *Management* 216(1-3), 28–40. doi:[10.1016/j.foreco.2005.05.059](https://doi.org/10.1016/j.foreco.2005.05.059).
- 597 Balvanera, P., Pfisterer, A.B., Buchmann, N., He, J.S., Nakashizuka, T.,  
598 Raffaelli, D., Schmid, B., 2006. Quantifying the evidence for biodiversity  
599 effects on ecosystem functioning and services. *Ecology Letters* 9(10), 1146–  
600 1156.
- 601 Barrios, E., 2007. Soil biota, ecosystem services and land productivity. *Eco-*  
602 *logical Economics* 64, 269–285. doi:[10.1016/j.ecolecon.2007.03.004](https://doi.org/10.1016/j.ecolecon.2007.03.004).
- 603 Bengtsson, J., Ahnström, J., Weibull, A.C., 2005. The effects of organic  
604 agriculture on biodiversity and abundance: a meta-analysis. *Journal of*  
605 *Applied Ecology* 42, 261–269. doi:[10.1111/j.1365-2664.2005.01005.x](https://doi.org/10.1111/j.1365-2664.2005.01005.x).
- 606 Bennett, E.M., Peterson, G.D., Gordon, L.J., 2009. Understanding relation-  
607 ships among multiple ecosystem services. *Ecology Letters* 12, 1394–1404.  
608 doi:[10.1111/j.1461-0248.2009.01387.x](https://doi.org/10.1111/j.1461-0248.2009.01387.x).

- 609 Berkes, F., Folke, C., 1998. Linking social and ecological systems for resilience  
610 and sustainability, in: Berkes, F., Folke, C. (Eds.), Linking sociological  
611 and ecological systems: management practices and social mechanisms for  
612 building resilience. Cambridge University Press, pp. 1–25.
- 613 Bolliger, J., Bättig, M., Gallati, J., Kläy, A., Stauffacher, M., Kienast, F.,  
614 2011. Landscape multifunctionality: a powerful concept to identify effects  
615 of environmental change. *Regional Environmental Change* 11, 203–206.  
616 doi:[10.1007/s10113-010-0185-6](https://doi.org/10.1007/s10113-010-0185-6).
- 617 Boreux, V., Kushalappa, C.G., Vaast, P., Ghazoul, J., 2013. Interactive  
618 effects among ecosystem services and management practices on crop pro-  
619 duction: Pollination in coffee agroforestry systems. *Proceedings of the*  
620 *National Academy of Sciences of the United States of America* 110, 8387–  
621 8392. doi:[10.1073/pnas.1210590110](https://doi.org/10.1073/pnas.1210590110).
- 622 van Breemen, N., 1993. Soils as biotic constructs favouring net primary pro-  
623 ductivity. *Geoderma* 57, 183–211. doi:[10.1016/0016-7061\(93\)90002-3](https://doi.org/10.1016/0016-7061(93)90002-3).
- 624 Burkhard, B., Kroll, F., Müller, F., Windhorst, W., 2009. Landscapes ca-  
625 pacities to provide ecosystem services a concept for land-cover based as-  
626 sessments. *Landscape Online* 15, 1–22. doi:[10.3097/L0.200915](https://doi.org/10.3097/L0.200915).
- 627 Carpenter, S.R., Mooney, H.A., Agard, J., Capistrano, D., DeFries, R.S.,  
628 Díaz, S., Dietz, T., Duraiappah, A.K., Oteng-Yeboah, A., Pereira, H.M.,  
629 Perrings, C., Reid, W.V., Sarukhan, J., Scholes, R.J., Whyte, A., 2009.

- 630 Science for managing ecosystem services: Beyond the Millennium Ecosys-  
631 tem Assessment. Proceedings of the National Academy of Sciences of the  
632 United States of America 106, 1305–1312. doi:[10.1073/pnas.0808772106](https://doi.org/10.1073/pnas.0808772106).
- 633 Chan, K.M.A., Shaw, M.R., Cameron, D.R., Underwood, E.C., Daily, G.C.,  
634 2006. Conservation planning for ecosystem services. PLoS Biology 4, e379.  
635 doi:[10.1371/journal.pbio.0040379](https://doi.org/10.1371/journal.pbio.0040379).
- 636 Cimon-Morin, J., Darveau, M., Poulin, M., 2013. Fostering synergies between  
637 ecosystem services and biodiversity in conservation planning: A review.  
638 Biological Conservation 166, 144–154. doi:[10.1016/j.biocon.2013.06.](https://doi.org/10.1016/j.biocon.2013.06.023)  
639 [023](https://doi.org/10.1016/j.biocon.2013.06.023).
- 640 Cork, S., Stoneham, G., Lowe, K., 2007. Ecosystem Services and Australian  
641 Natural Resource Management (NRM) Futures. Technical Report. the  
642 Ecosystem Services Working Group of the Natural Resource Policies and  
643 Programs Committee.
- 644 Crawford, J.W., Harris, J.A., Ritz, K., Young, I.M., 2005. Towards an evolu-  
645 tionary ecology of life in soil. Trends in Ecology & Evolution 20(2), 81–87.  
646 doi:[10.1016/j.tree.2004.11.014](https://doi.org/10.1016/j.tree.2004.11.014).
- 647 Daniel, T.C., Muhar, A., Arnberger, A., Aznar, O., Boyd, J.W., Chan,  
648 K.M.A., Costanza, R., Elmqvist, T., Flint, C.G., Gobster, P.H., Grêt-  
649 Regamey, A., Lave, R., Muhar, S., Penker, M., Ribe, R.G., Schaup-  
650 penlehner, T., Sikor, T., Soloviy, I., Spierenburg, M., Taczanowska,

- 651 K., Tam, J., von der Dunk, A., 2012. Contributions of cultural ser-  
652 vices to the ecosystem services agenda. Proceedings of the National  
653 Academy of Sciences of the United States of America 109, 8812–8819.  
654 doi:[10.1073/pnas.1114773109](https://doi.org/10.1073/pnas.1114773109).
- 655 Dickie, I.A., Yeates, G.W., St. John, M.G., Stevenson, B.A., Scott, J.T.,  
656 Rillig, M.C., Peltzer, D.A., Orwin, K.H., Kirschbaum, M.U.F., Hunt, J.E.,  
657 Burrows, L.E., Barbour, M.M., Aislabie, J., 2011. Ecosystem service and  
658 biodiversity trade-offs in two woody successions. Journal of Applied Ecol-  
659 ogy 48, 926–934. doi:[10.1111/j.1365-2664.2011.01980.x](https://doi.org/10.1111/j.1365-2664.2011.01980.x).
- 660 Dormann, C.F., McPherson, J.M., Araújo, M.B., Bivand, R., Bolliger, J.,  
661 Carl, G., Davies, R.G., Hirzel, A., Jetz, W., Kissling, W.D., Kühn, I.,  
662 Ohlemüller, R., Peres-Neto, P.R., Reineking, B., Schröder, B., Schurr,  
663 F.M., Wilson, R., 2007. Methods to account for spatial autocorrelation  
664 in the analysis of species distributional data: a review. Ecography 30,  
665 609–628. doi:[10.1111/j.2007.0906-7590.05171.x](https://doi.org/10.1111/j.2007.0906-7590.05171.x).
- 666 Efron, B., Tibshirani, R., 1994. An introduction to the bootstrap. CRC  
667 Press.
- 668 Faraway, J.J., 2005. Extending the linear model with R: generalized linear,  
669 mixed effects and nonparametric regression models. Taylor & Francis Inc.
- 670 Garibaldi, L.A., Steffan-Dewenter, I., Winfree, R., Aizen, M.A., Bommarco,  
671 R., Cunningham, S.A., Kremen, C., Carvalheiro, L.G., Harder, L.D., Afik,

- 672 O., Bartomeus, I., Benjamin, F., Boreux, V., Cariveau, D., Chacoff, N.P.,  
673 Dudenhöffer, J.H., Freitas, B.M., Ghazoul, J., Greenleaf, S., Hipólito, J.,  
674 Holzschuh, A., Howlett, B., Isaacs, R., Javorek, S.K., Kennedy, C.M.,  
675 Krewenka, K.M., Krishnan, S., Mandelik, Y., Mayfield, M.M., Motzke, I.,  
676 Munyuli, T., Nault, B.A., Otieno, M., Petersen, J., Pisanty, G., Potts,  
677 S.G., Rader, R., Ricketts, T.H., Rundlöf, M., Seymour, C.L., Schüepp, C.,  
678 Szentgyörgyi, H., Taki, H., Tscharntke, T., Vergara, C.H., Viana, B.F.,  
679 Wanger, T.C., Westphal, C., Williams, N., Klein, A.M., 2013. Wild polli-  
680 nators enhance fruit set of crops regardless of honey bee abundance. *Sci-*  
681 *ence* 29, 1608–1611.
- 682 de Groot, R., Alkemade, R., Braat, L., Hein, L., Willemsen, L., 2010. Chal-  
683 lenges in integrating the concept of ecosystem services and values in land-  
684 scape planning, management and decision making. *Ecological Complexity*  
685 7(3), 260–272. doi:[10.1016/j.ecocom.2009.10.006](https://doi.org/10.1016/j.ecocom.2009.10.006).
- 686 de Groot, R.S., Wilson, M.A., Boumans, R.M., 2002. A typology for the  
687 classification, description and valuation of ecosystem functions, goods and  
688 services. *ecological economics*,. *Ecological Economics* 41, 393–408.
- 689 Haase, D., Schwarz, N., Strohbach, M., Kroll, F., Seppelt, R., 2012. Syn-  
690 ergies, trade-offs, and losses of ecosystem services in urban regions: an  
691 integrated multiscale framework applied to the Leipzig-Halle region, Ger-  
692 many. *Ecology and Society* 17(3), 22. doi:[10.5751/es-04853-170322](https://doi.org/10.5751/es-04853-170322).
- 693 Haines-Young, R., Potschin, M., 2013. Common International Classi-

694 fication of Ecosystem Services (CICES): Consultation on Version 4,  
695 August-December 2012. Technical Report. EEA Framework Contract No  
696 EEA/IEA/09/003.

697 Harrison, P., Berry, P., Simpson, G., Haslett, J., Blicharska, M., Bucur, M.,  
698 Dunford, R., Egoh, B., Garcia-Llorente, M., Geamănă, N., Geertsema,  
699 W., Lommelen, E., Meiresonne, L., Turkelboom, F., 2014. Linkages be-  
700 tween biodiversity attributes and ecosystem services: A systematic review.  
701 *Ecosystem Services* 9, 191–203. doi:[10.1016/j.ecoser.2014.05.006](https://doi.org/10.1016/j.ecoser.2014.05.006).

702 Hein, L., van Koppen, K., de Groot, R.S., van Ierland, E.C., 2006. Spatial  
703 scales, stakeholders and the valuation of ecosystem services. *Ecological*  
704 *Economics* 57, 209–228. doi:[10.1016/j.ecolecon.2005.04.005](https://doi.org/10.1016/j.ecolecon.2005.04.005).

705 Hillebrand, H., Matthiessen, B., 2009. Biodiversity in a complex world:  
706 consolidation and progress in functional biodiversity research. *Ecology* 12,  
707 1405–1419. doi:[10.1111/j.1461-0248.2009.01388.x](https://doi.org/10.1111/j.1461-0248.2009.01388.x).

708 Hinkel, D., Wiersma, W., Jurs, S., 2003. *Applied Statistics for the Behavioral*  
709 *Sciences* 5th ed. Houghton Mifflin, Boston.

710 Hobbs, P.R., Sayre, K., Gupta, R., 2008. The role of conservation agriculture  
711 in sustainable agriculture. *Philosophical Transactions of the Royal Society*  
712 *B* 363, 543–555. doi:[10.1098/rstb.2007.2169](https://doi.org/10.1098/rstb.2007.2169).

713 Holling, C.S., 1996. Engineering resilience versus ecological resilience, in:

- 714 Schulze, P. (Ed.), *Engineering Within Ecological Constraints*. National  
715 Academy of Engineering, pp. 31–44.
- 716 Howe, C., Suich, H., Vira, B., Mace, G.M., 2014. Creating win-wins from  
717 trade-offs? ecosystem services for human well-being: A meta-analysis of  
718 ecosystem service trade-offs and synergies in the real world. *Global Envi-  
719 ronmental Change* 28, 263–275. doi:[10.1016/j.gloenvcha.2014.07.005](https://doi.org/10.1016/j.gloenvcha.2014.07.005).
- 720 Jacobs, M., 1997. Environmental valuation, deliberative democracy and pub-  
721 lic decision-making institutions, in: Foster, J. (Ed.), *Valuing Nature? Eco-  
722 nomics, Ethics and Environment..* Routledge, London, pp. 211–231.
- 723 Jopke, C., Kreyling, J., Maes, J., Koellner, T., 2014. Interactions among  
724 ecosystem services across europe: Bagplots and cumulative correlation co-  
725 efficients reveal synergies, trade-offs, and regional patterns. *Ecological  
726 Indicators* 49, 46–52. doi:[10.1016/j.ecolind.2014.09.037](https://doi.org/10.1016/j.ecolind.2014.09.037).
- 727 Kandziora, M., Burkhard, B., Felix, M., 2013. Interactions of ecosystem  
728 properties, ecosystem integrity and ecosystem service indicators a theo-  
729 retical matrix exercis. *Ecological Indicators* 28, 54–78. doi:[10.1016/j.  
730 ecolind.2012.09.006](https://doi.org/10.1016/j.ecolind.2012.09.006).
- 731 Klein, A.M., Vaissière, B.E., Cane, J.H., Steffan-Dewenter, I., Cunningham,  
732 S.A., Kremen, C., Tscharntke, T., 2007. Importance of pollinators in  
733 changing landscapes for world crops. *Proceedings of the Royal Society B:  
734 Biological Sciences* 274, 303–313. doi:[10.1098/rspb.2006.3721](https://doi.org/10.1098/rspb.2006.3721).



- 735 Kremen, C., 2005. Managing ecosystem services: what do we need to know  
736 about their ecology? *Ecology Letters* 8, 468–479.
- 737 Landers, D.H., Nahlik, A.M., 2013. Final Ecosystem Goods and Ser-  
738 vices Classification System (FEGS-CS). Technical Report EPA/600/R-  
739 13/ORD-004914. United States Environmental Protection Agency.
- 740 Landis, D.A., Wratten, S.D., Gurr, G.M., 2000. Habitat management to  
741 conserve natural enemies of arthropod pests in agriculture. *Annual Review*  
742 of Entomology 45, 175–201. doi:[10.1146/annurev.ento.45.1.175](https://doi.org/10.1146/annurev.ento.45.1.175).
- 743 Laruelle, P., 2012. Soil as habitat, in: Wall, D.H. (Ed.), *Soil Ecology and*  
744 *Ecosystem Services*. Oxford University Press, pp. 7–27.
- 745 Lautenbach, S., Seppelt, R., Liebscher, J., Dormann, C.F., 2012. Spatial and  
746 temporal trends of global pollination benefit. *PLoS ONE* 7(4), e35954.  
747 doi:[10.1371/journal.pone.0035954](https://doi.org/10.1371/journal.pone.0035954).
- 748 Lautenbach, S., Volk, M., Strauch, M., Whittaker, G., Seppelt, R., 2013.  
749 Optimization-based trade-off analysis of biodiesel crop production for man-  
750 aging an agricultural catchment. *Environmental Modelling & Software* 48,  
751 98–112. doi:[10.1016/j.envsoft.2013.06.006](https://doi.org/10.1016/j.envsoft.2013.06.006).
- 752 Lavorel, S., Grigulis, K., Lamarque, P., Colace, M.P., Garden, D., Girel,  
753 J., Pellet, G., Douzet, R., 2011. Using plant functional traits to under-  
754 stand the landscape distribution of multiple ecosystem services. *Journal*  
755 of Ecology 99(1), 135–147. doi:[10.1111/j.1365-2745.2011.01914.x](https://doi.org/10.1111/j.1365-2745.2011.01914.x).

- 756 Legendre, P., Legendre, L., 2003. Numerical ecology. Elsevier.
- 757 Lichtfouse, E., Navarrete, M., Debaeke, P., Souchère, V., Alberola, C.,  
758 Ménassieu, J., 2009. Agronomy for sustainable agriculture: A review.  
759 Sustainable Agriculture , 1–7doi:[10.1007/978-90-481-2666-8\\_1](https://doi.org/10.1007/978-90-481-2666-8_1).
- 760 Liu, J., Hull, V., Batistella, M., DeFries, R., Dietz, T., Fu, F., Hertel, T.W.,  
761 Izaurrealde, R.C., Lambin, E.F., Li, S. F. and Li, S., Martinelli, L.A., Mc-  
762 Connell, W.J., Moran, E.F., Naylor, R., Ouyang, Z., Polenske, K.R., Reen-  
763 berg, A., Rocha, G.d.M., Simmons, C.S., Verburg, P.H., Vitousek, P.M.,  
764 Zhang, F., Zhu, C., 2013. Framing sustainability in a telecoupled world.  
765 Ecology and Society 18(2), 26. doi:[10.5751/ES-05873-180226](https://doi.org/10.5751/ES-05873-180226).
- 766 Liu, J., Mooney, H., Hull, V., Davis, S.J., Gaskell, J., Hertel, T., Lubchenco,  
767 J., Seto, K.C., Gleick, P., Kremen, C., Li, S., 2015. Systems integration  
768 for global sustainability. Science 347. doi:[10.1126/science.1258832](https://doi.org/10.1126/science.1258832).
- 769 MA, 2005. Ecosystems and Human Well-being: Synthesis. Millennium  
770 Ecosystem Assessment, Island Press, Washington, DC.
- 771 Mace, G.M., Norris, K., Fitter, A.H., 2012. Biodiversity and ecosystem  
772 services: a multilayered relationship. Trends in Ecology & Evolution 27(1),  
773 19–26. doi:[10.1016/j.tree.2011.08.006](https://doi.org/10.1016/j.tree.2011.08.006).
- 774 Maes, J., Paracchini, M., Zulian, G., Dunbar, M., Alkemade, R., 2012. Syn-  
775 ergies and trade-offs between ecosystem service supply, biodiversity, and

776 habitat conservation status in europe. *Biological Conservation* 155, 1–12.  
777 doi:[10.1016/j.biocon.2012.06.016](https://doi.org/10.1016/j.biocon.2012.06.016).

778 Martín-López, B., Gómez-Baggethun, E., García-Llorente, M., Montes, C.,  
779 2013. Trade-offs across value-domains in ecosystem services assessment.  
780 *Ecological Indicators* 37, 220–228. doi:[10.1016/j.ecolind.2013.03.003](https://doi.org/10.1016/j.ecolind.2013.03.003).

781 Martín-López, B., Montes, C., Benayas, J., 2007. Influence of user char-  
782 acteristics on valuation of ecosystem services in doñana natural pro-  
783 tected area (south-west spain). *Environmental Conservation* 34, 215–224.  
784 doi:[10.1017/S0376892907004067](https://doi.org/10.1017/S0376892907004067).

785 Martínez-Harms, M.J., Balvanera, P., 2012. Methods for mapping ecosystem  
786 service supply: a review. *International Journal of Biodiversity Science,*  
787 *Ecosystem Services & Management* 8, 17–25. doi:[10.1080/21513732.](https://doi.org/10.1080/21513732.2012.663792)  
788 [2012.663792](https://doi.org/10.1080/21513732.2012.663792).

789 Mason, R.D., Lind, D.A., 1983. *Statistics: An introduction*. Houghton Mifflin  
790 Harcourt P.

791 Mastrangelo, M.E., Weyland, F., Villarino, S.H., Barral, M.P., Nahuelhual,  
792 L., Latterra, P., 2014. Concepts and methods for landscape multifunction-  
793 ality and a unifying framework based on ecosystem services. *Landscape*  
794 *Ecology* 29, 345–358. doi:[10.1007/s10980-013-9959-9](https://doi.org/10.1007/s10980-013-9959-9).

795 Mattison, E.H., Norris, K., 2005. Bridging the gaps between agricultural

796 policy, land-use and biodiversity. *Trends in Ecology & Evolution* 20, 610–  
797 616.

798 Mononen, L., Auvinen, A.P., Ahokumpu, A.L., Aarras, M.R.N., Tolvanen,  
799 H., Kamppinen, M., Viirret, E., Kumpula, T., Vihervaara, P., 2015. Na-  
800 tional ecosystem service indicators: Measures of social-ecological sustain-  
801 ability. *Ecological Indicators* x, xx. doi:[10.1016/j.ecolind.2015.03.](https://doi.org/10.1016/j.ecolind.2015.03.041)  
802 [041](https://doi.org/10.1016/j.ecolind.2015.03.041).

803 Mouchet, M.A., Lamarque, P., Martín-López, B., Crouzat, E., Gos, P., By-  
804 czek, C., Lavorel, S., 2014. An interdisciplinary methodological guide for  
805 quantifying associations between ecosystem services. *Global Environmen-*  
806 *tal Change* 28, 298–308. doi:[10.1016/j.gloenvcha.2014.07.012](https://doi.org/10.1016/j.gloenvcha.2014.07.012).

807 Nemeč, K.T., Raudsepp-Hearne, C., 2012. The use of geographic information  
808 systems to map and assess ecosystem services. *Biodiversity and conserva-*  
809 *tion* 22, 1–15. doi:[10.1007/s10531-012-0406-z](https://doi.org/10.1007/s10531-012-0406-z).

810 Nieto-Romero, M., Oteros-Rozas, E., José A. González, B.M.L., 2014. Ex-  
811 ploring the knowledge landscape of ecosystem services assessments in  
812 mediterranean agroecosystems: Insights for future research. *Environmen-*  
813 *tal Science & Policy* 37, 121–133. doi:[10.1016/j.envsci.2013.09.003](https://doi.org/10.1016/j.envsci.2013.09.003).

814 OECD, 2003. Multifunctionality: The policy implementation. Technical  
815 Report. OECD.

- 816 O'Farrell, P.J., Reyers, B., Maitre, D.C.L., Milton, S.J., Egoh, B., Maherry,  
817 A., Colvin, C., Atkinson, D., Lange, W.D., Blignaut, J.N., Cowling, R.M.,  
818 2010. Multi-functional landscapes in semi arid environments: implications  
819 for biodiversity and ecosystem services. *Landscape Ecology* 25, 1231–1246.  
820 doi:[10.1007/s10980-010-9495-9](https://doi.org/10.1007/s10980-010-9495-9).
- 821 Olschewski, R., Klein, A.M., Tschardtke, T., 2010. Economic trade-offs  
822 between carbon sequestration, timber production, and crop pollination  
823 in tropical forested landscapes. *Ecological Complexity* 7(3), 314–319.  
824 doi:[10.1016/j.ecocom.2010.01.002](https://doi.org/10.1016/j.ecocom.2010.01.002).
- 825 Paracchini, M.L., Pacini, C., Jones, M.L.M., rez Soba, M.P., 2011. An aggre-  
826 gation framework to link indicators associated with multifunctional land  
827 use to the stakeholder evaluation of policy options. *Ecological Indicators*  
828 11, 71–80.
- 829 Phalan, B., Onial, M., Balmford, A., Green, R.E., 2011. Reconciling food  
830 production and biodiversity conservation: Land sharing and land sparing  
831 compared. *Science* 333, 1289–1291. doi:[10.1126/science.1208742](https://doi.org/10.1126/science.1208742).
- 832 de Ponti, T., Rijk, B., van Ittersum, M.K., 2012. The crop yield gap be-  
833 tween organic and conventional agriculture. *Agricultural Systems* 108,  
834 1–9. doi:[10.1016/j.agsy.2011.12.004](https://doi.org/10.1016/j.agsy.2011.12.004).
- 835 Pullin, A.S., Stewart, G.B., 2006. Guidelines for systematic review in conser-

836 vation and environmental management. *Conservation Biology* 20, 1647–  
837 1656. doi:[10.1111/j.1523-1739.2006.00485.x](https://doi.org/10.1111/j.1523-1739.2006.00485.x).

838 R Core Team, 2015. *R: A Language and Environment for Statistical Com-*  
839 *puting*. R Foundation for Statistical Computing. Vienna, Austria. URL:  
840 <http://www.R-project.org/>.

841 Raudsepp-Hearne, C., Peterson, G.D., Bennett, E.M., 2010. Ecosystem ser-  
842 vice bundles for analyzing tradeoffs in diverse landscapes. *Proceedings of*  
843 *the National Academy of Sciences of the United States of America* 107,  
844 5242–5247. doi:[10.1073/pnas.0907284107](https://doi.org/10.1073/pnas.0907284107).

845 Reidsma, P., Tekelenburg, T., van den Berg, M., Alkemade, R., 2006. Im-  
846 pacts of land-use change on biodiversity: An assessment of agricultural  
847 biodiversity in the european union. *Agriculture, Ecosystems & Environ-*  
848 *ment* 114, 86–102. doi:[10.1016/j.agee.2005.11.026](https://doi.org/10.1016/j.agee.2005.11.026).

849 Rodríguez, J.P., Beard, T.D., Jr, Bennett, E.M., Cumming, G.S., Cork,  
850 S.J., Agard, J., Dobson, A.P., Peterson, G.D., 2006. Trade-offs across  
851 space, time, and ecosystem services. *Ecology and Society* 11(1), 28. URL:  
852 <http://www.ecologyandsociety.org/vol11/iss1/art28/>.

853 Schindler, S., Sebesvari, Z., Damm, C., Euller, K., Mauerhofer, V., Schnei-  
854 dergruber, A., Biró, M., Essl, F., Kanka, R., Lauwaars, S.G., Schulz-  
855 Zunkel, C., van der Sluis, T., Kropik, M., Gasso, V., Krug, A., Pusch,  
856 M.T., Zulka, K.P., Lazowski, W., Hainz-Renetzeder, C., Henle, K., Wr-

- 857 bka, T., 2014. Multifunctionality of floodplain landscapes: relating man-  
858 agement options to ecosystem services. *Landscape Ecology* 29, 229–244.  
859 doi:[10.1007/s10980-014-9989-y](https://doi.org/10.1007/s10980-014-9989-y).
- 860 Seidl, R., Rammer, W., Jäger, D., Currie, W.S., Lexer, M.J., 2007. Assessing  
861 trade-offs between carbon sequestration and timber production within a  
862 framework of multi-purpose forestry in austria. *Forest Ecology and Man-  
863 agement* 248(1-2), 64–79.
- 864 Seppelt, R., Dormann, C.F., Eppink, F.V., Lautenbach, S., Schmidt, S.,  
865 2011. A quantitative review of ecosystem service studies: approaches,  
866 shortcomings and the road ahead. *Journal of Applied Ecology* 48, 630–  
867 636. doi:[10.1111/j.1365-2664.2010.01952.x](https://doi.org/10.1111/j.1365-2664.2010.01952.x).
- 868 Seufert, V., Ramankutty, N., Foley, J.A., 2012. Comparing the yields of  
869 organic and conventional agriculture. *Nature* 485, 229–232. doi:[10.1038/  
870 nature11069](https://doi.org/10.1038/nature11069).
- 871 Six, J., Elliott, E., Paustian, K., 2000. Soil macroaggregate turnover and mi-  
872 croaggregate formation: a mechanism for c sequestration under no-tillage  
873 agriculture. *Soil Biology & Biochemistry* 32, 2099–2103.
- 874 Smith, B., Prentice, I., Sykes, M., 2001. Representation of vegetation dynam-  
875 ics in the modelling of terrestrial ecosystems: comparing two contrasting  
876 approaches within european climate space. *Global Ecology & Biogeogra-  
877 phy* 10, 621–637.

- 878 Tabachnick, B., Fidell, L., 1989. Using Multivariate Statistics. Harper &  
879 Row Publishers, New York.
- 880 Tallis, H., Polasky, S., 2009. Mapping and valuing ecosystem services as  
881 an approach for conservation and natural-resource management. Annals  
882 of the New York Academy of Sciences 1162, 265–283. doi:[10.1111/j.  
883 1749-6632.2009.04152.x](https://doi.org/10.1111/j.1749-6632.2009.04152.x).
- 884 Taylor, R., 1990. Interpretation of the correlation coefficient: A basic review.  
885 Journal of Diagnostic Medical Sonography 6, 35–39.
- 886 Naturkapital Deutschland TEEB DE, 2014. Naturkapital und klimapolitik  
887 synergien und konflikte. kurzbericht für entscheidungsträger. Technische  
888 Universität Berlin and Helmholtz-Zentrum für Umweltforschung UFZ,  
889 Leipzig.
- 890 Turkelboom, F., Raquez, P., Dufrêne, M., Raes, L., Simoens, I., Jacobs, S.,  
891 Stevens, M., Vreese, R.D., Panis, J.A., Hermy, M., Thoonen, M., Liekens,  
892 I., Fontaine, C., Dendoncker, N., van der Biest, K., Casaer, J., Heyrman,  
893 H., Meiresonne, L., Keune, H., 2013. CICES going local: Ecosystem Ser-  
894 vices Classification adapted for a highly populated country. Ecosystem  
895 Services , 223–247doi:[10.1016/B978-0-12-419964-4.00018-4](https://doi.org/10.1016/B978-0-12-419964-4.00018-4).
- 896 Turner, K.G., Odgaard, M.V., Bøcher, P.K., Dalgaard, T., Svenning, J.C.,  
897 2014. Bundling ecosystem services in denmark: Trade-offs and synergies  
898 ina cultural landscape. Landscape and Urban Planning 125, 89–104.



- 899 Václavík, T., Lautenbach, S., Kuemmerle, T., Seppelt, R., 2013. Mapping  
900 global land system archetypes. *Global Environmental Change* 23, 1637–  
901 1647. doi:[10.1016/j.gloenvcha.2013.09.004](https://doi.org/10.1016/j.gloenvcha.2013.09.004).
- 902 Vatn, A., Bromley, D.W., 1994. Choices without prices without apolo-  
903 gies. *Journal of Environmental Economics and Management* 26, 129–148.  
904 doi:[10.1006/jjeem.1994.1008](https://doi.org/10.1006/jjeem.1994.1008).
- 905 Weber, J.C., Lamb, D.R., 1970. *Statistics and Research in Physical Educa-*  
906 *tion*. Mosby.
- 907 Westa, P.C., Gibbs, H.K., Monfreda, C., Wagner, J., Barford, C.C., Carpen-  
908 ter, S.R., Foley, J.A., 2010. Trading carbon for food: Global comparison  
909 of carbon stocks vs. crop yields on agricultural land. *Proceedings of the*  
910 *National Academy of Sciences of the United States of America* 107, 19645–  
911 19648.
- 912 Wiggering, H., Dalchow, C., Glemnitz, M., Helming, K., Müller, K., Schultz,  
913 A., Stachow, U., Zander, P., 2006. Indicators for multifunctional land use  
914 linking socio-economic requirements with landscape potentials. *Ecological*  
915 *Indicators* 6, 238–249.
- 916 Willemen, L., Veldkamp, A., Verburg, P., Hein, L., Leemans, R., 2012. A  
917 multi-scale modelling approach for analysing landscape service dynam-  
918 ics. *Journal of Environmental Management* 100, 86–95. doi:[10.1016/  
919 j.jenvman.2012.01.022](https://doi.org/10.1016/j.jenvman.2012.01.022).

- 920 Young, I., Ritz, K., 2000. Tillage, habitat space and function of soil microbes.  
921 Soil and Tillage Research 53, 201–213. doi:[10.1016/S0167-1987\(99\)](https://doi.org/10.1016/S0167-1987(99)00106-3)  
922 [00106-3](https://doi.org/10.1016/S0167-1987(99)00106-3).
- 923 Zhang, W., Ricketts, T.H., Kremen, C., Carney, K., Swinton, S.M., 2007.  
924 Ecosystem services and dis-services to agriculture. Ecological Economics  
925 64(2), 253–260. doi:[10.1016/j.ecolecon.2007.02.024](https://doi.org/10.1016/j.ecolecon.2007.02.024).
